# Supplementary material for: Safety of pazopanib and sunitinib in treatment-naive patients with metastatic renal cell carcinoma: Asian versus non-Asian subgroup analysis of the COMPARZ trial
Source: PubMed Central journal article supplement (PMC5964681; doi:10.1186/s13045-018-0617-1), 2018-05-22

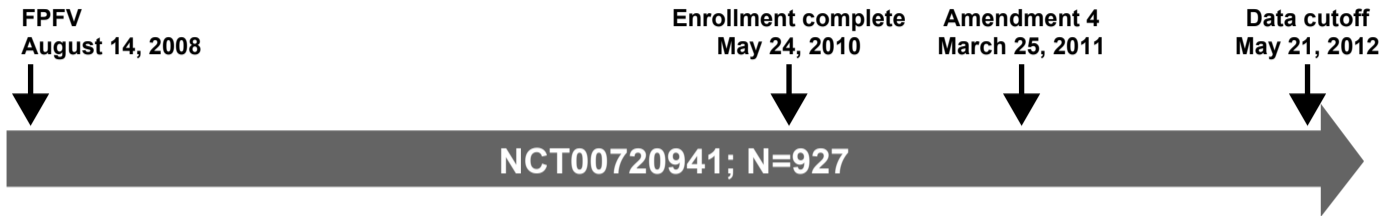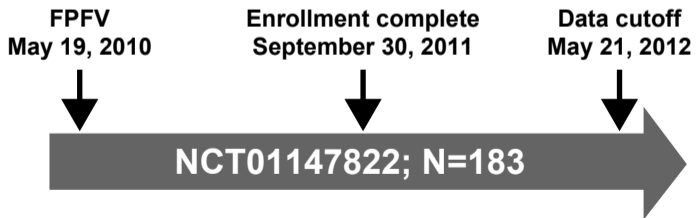

Supplement: 13045_2018_617_MOESM1_ESM.pdf [file 13045_2018_617_MOESM1_ESM.pdf]
